# Supplementary material
Source: publisher site journal article supplement (https://www.dovepress.com/article/426374)

**Supplementary Table1 Diagnostic accuracy of noninvasive methods for the diagnosis of advanced fibrosis and cirrhosis**

| **Variable** | **ObAUROC**  **(95% CI)** | **AdjAUROC** | **P** | **Variable** | **ObAUROC**  **(95% CI)** | **AdjAUROC** | **P** |
| --- | --- | --- | --- | --- | --- | --- | --- |
| **TE‡** | 0.884  (0.834 0.934) | 0.902 | <0.001 | **TE¶** | 0.898  (0.844 0.952) | 0.914 | 0.056 |
| **FIB-4*** | 0.707  (0.628 0.786) | 0.725 | <0.001 | **FIB-4§** | 0.818  (0.731 0.904) | 0.821 | 0.109 |
| **APRI†** | 0.696  (0.617 0.776) | 0.714 | <0.001 | **APRI||** | 0.820  (0.739 0.901) | 0.830 | 0.056 |

AdjAUROC, adjusted AUROC; APRI, aspartate aminotransferase to platelet ratio index; FIB-4, fibrosis index based on the four factors; TE, transient elastography; CI, confidence interval; observed AUROC, ObAUROC; *****vs. TE: Z = 4.090, P <0.001; † vs. FIB-4: Z = 0.392, P =0.695; ‡vs. APRI: Z = 4.246, P <0.001.§vs. TE: Z = 1.604, P =0.109; || vs. FIB-4: Z = 0.067, P =0.946; ¶ vs. APRI: Z = 1.911, P = 0.056.

**Supplementary Figure 1** Flow chart of patients with HBV


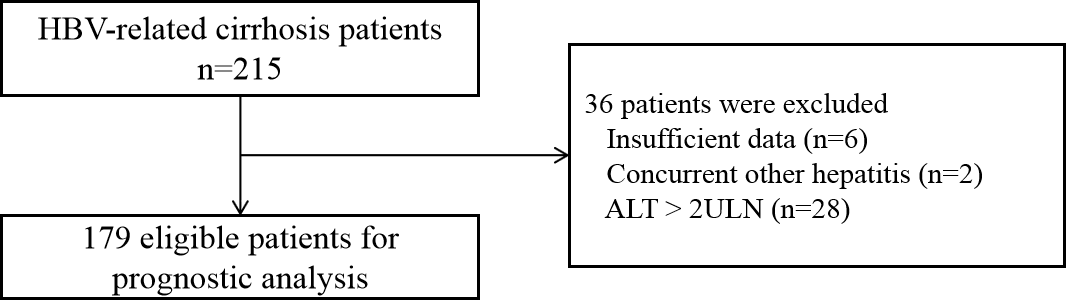

Supplement: Supplementary file 1 [file get_supplementary_file.php]
